# Supplementary material
Source: Research Square preprint supplement (doi:10.21203/rs.3.rs-9820230/v1)
Supplement: Supplementary file 1 [file 626f26ed83002e437c8665e0.docx]

**
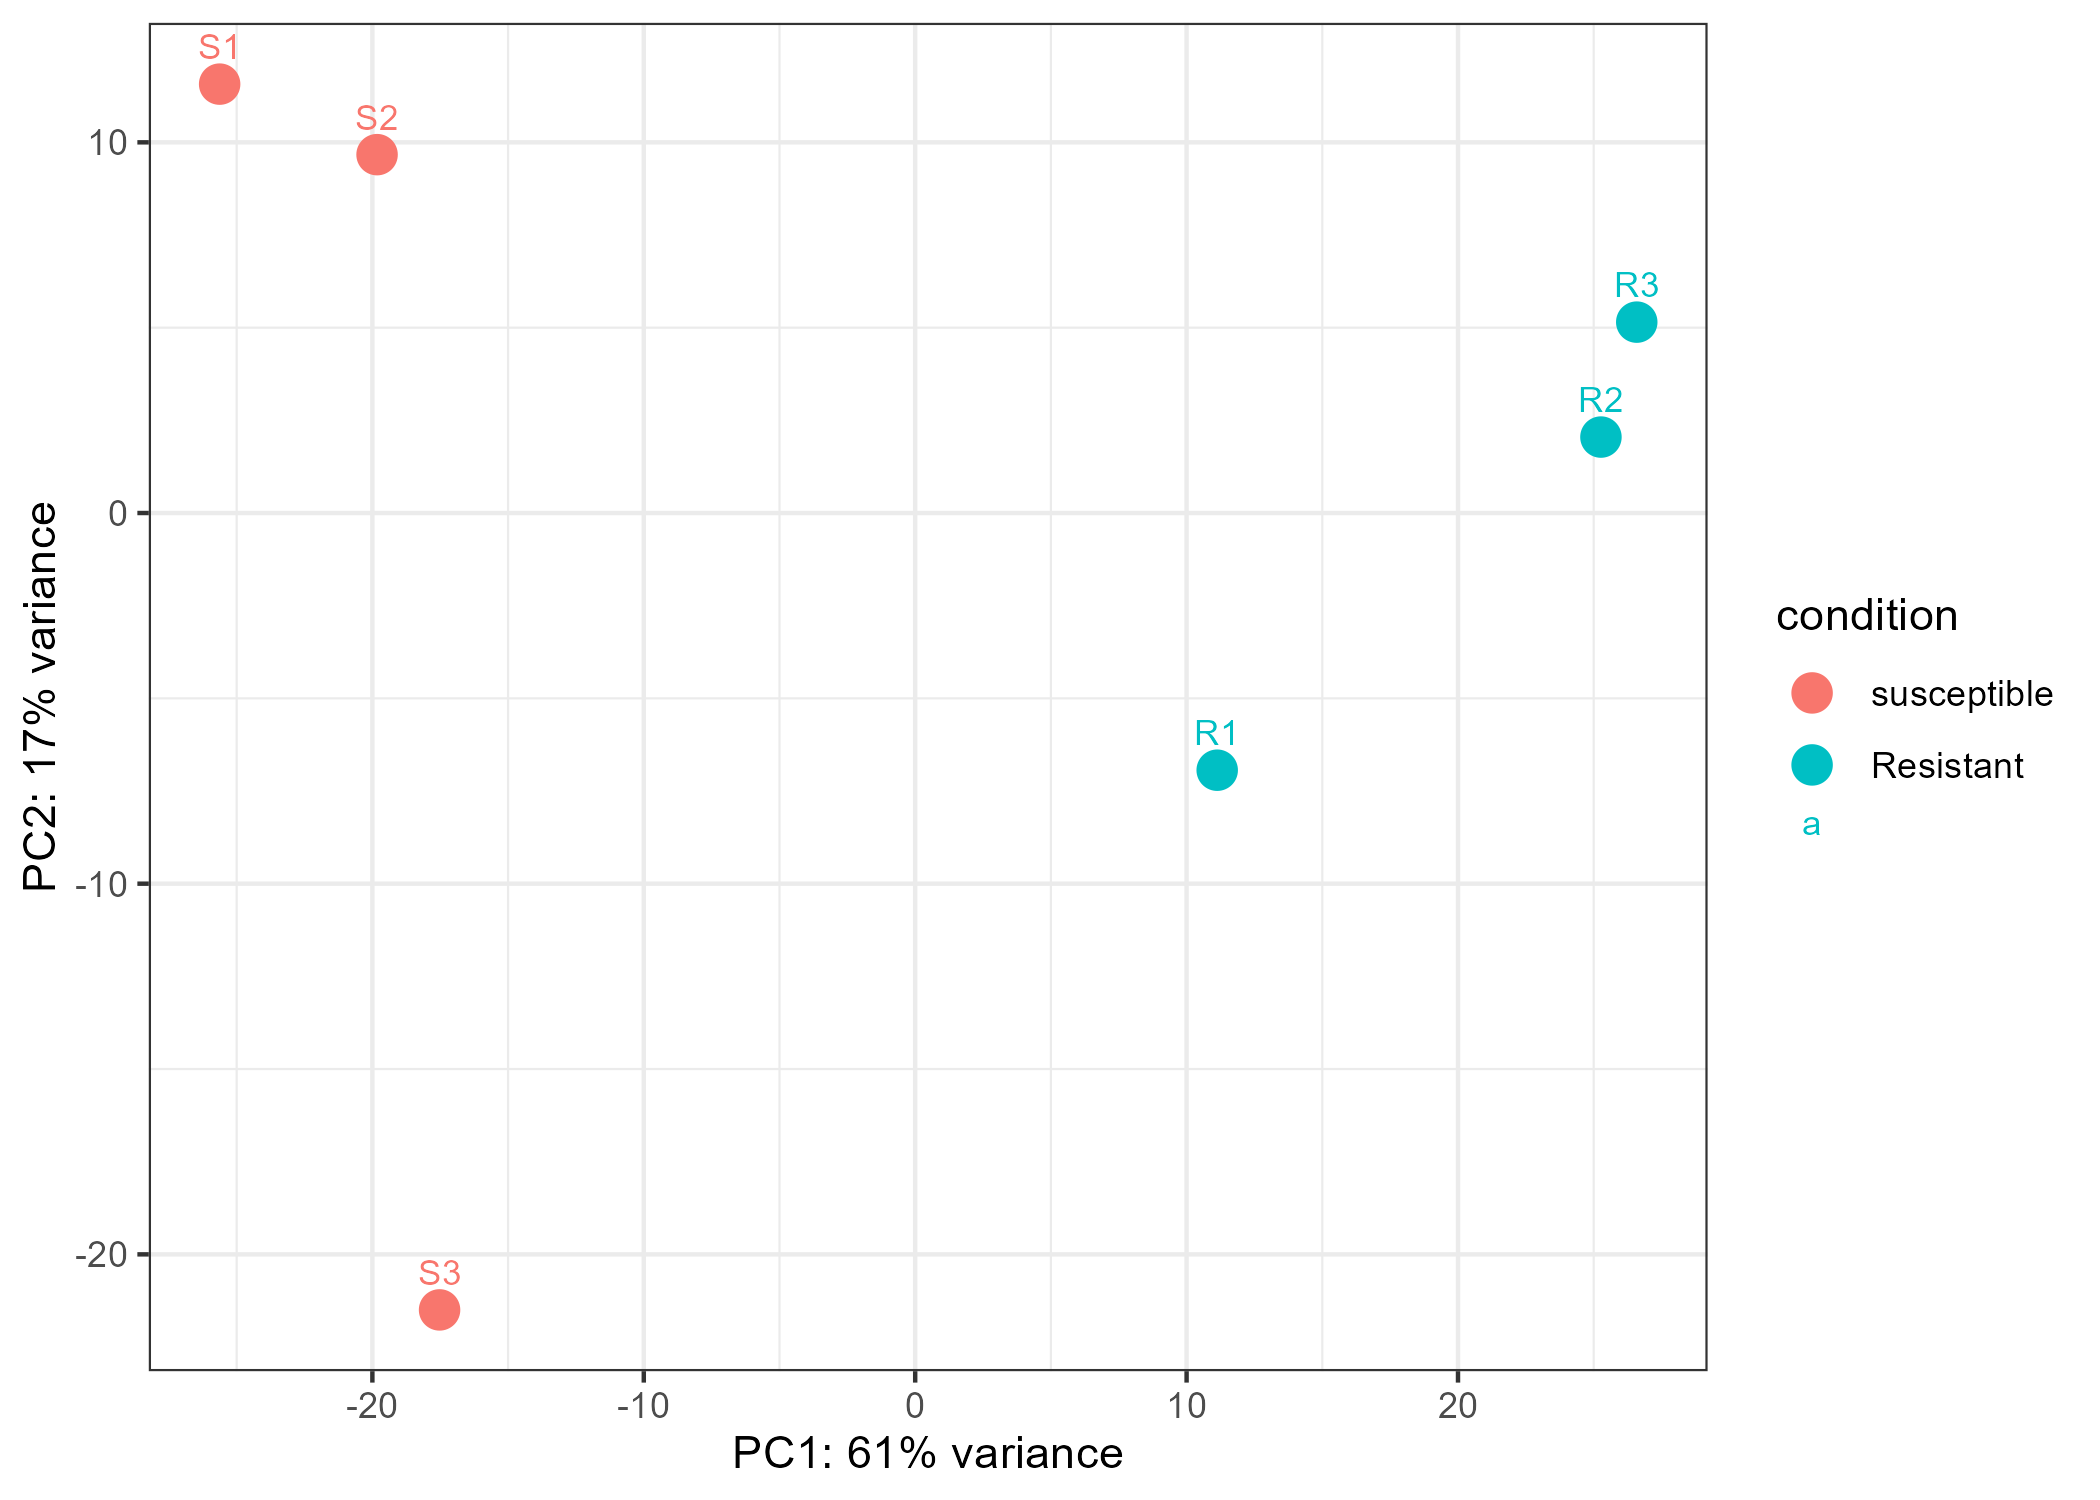
Supplementary Figure 1. PCA plot of RNA-seq samples (R=common scab resistant potato variety, S=common scab resistant potato variety).**


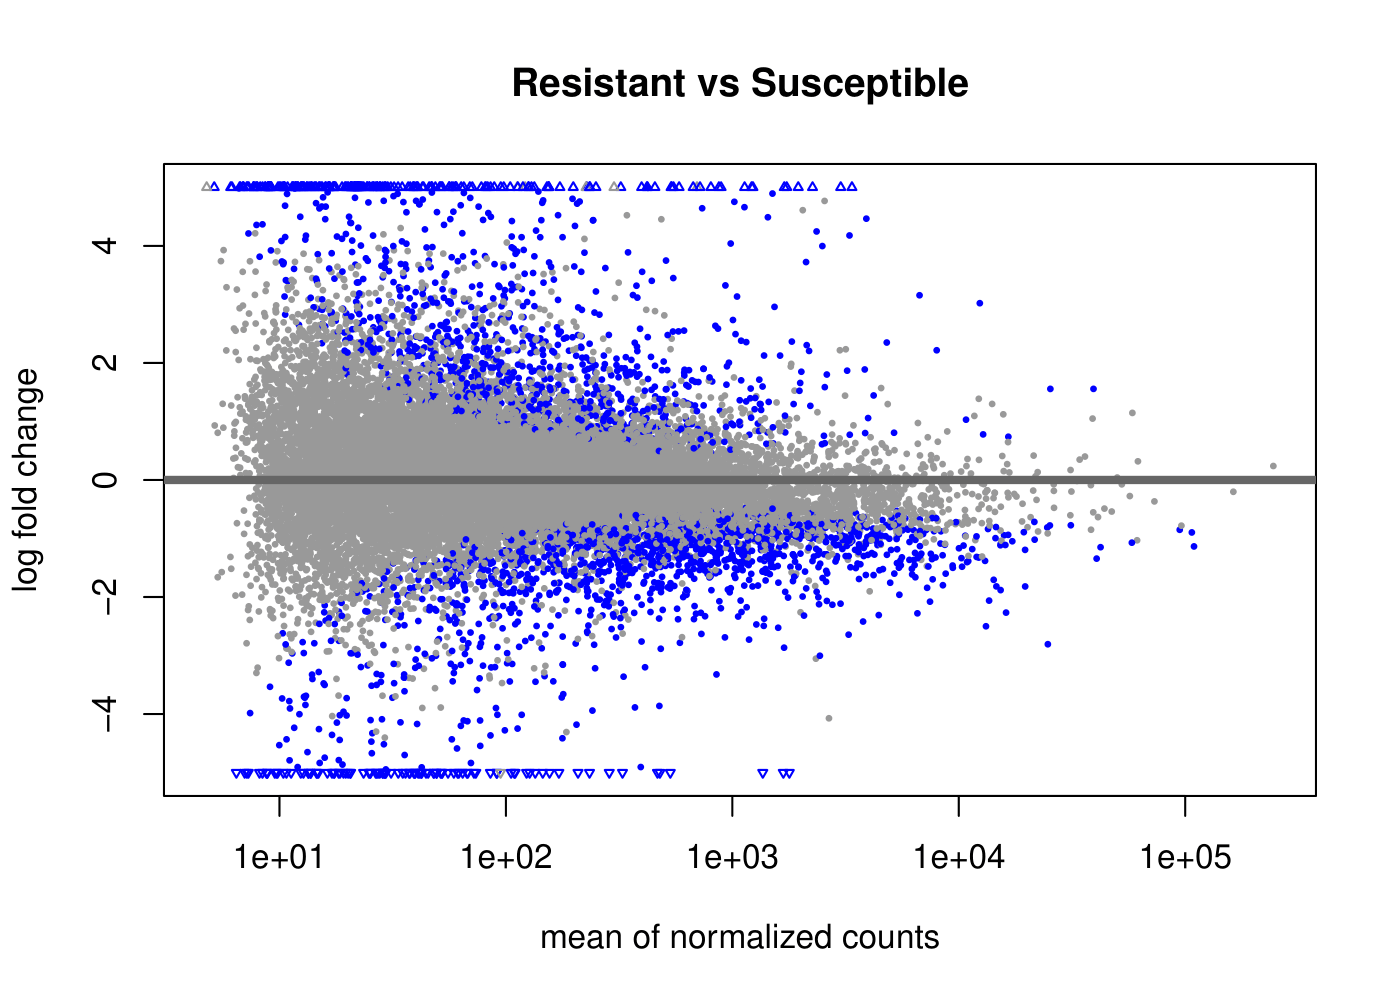
 **Supplementary Figure 2. MA plot of DEGs.**

**
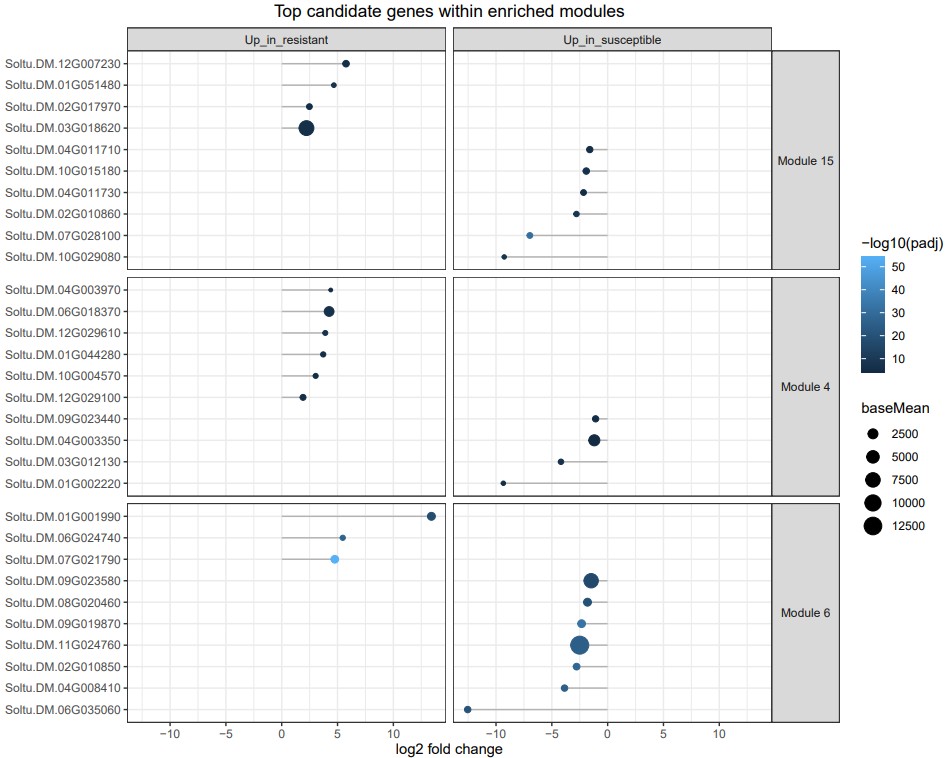
Supplementary Figure 3. Top candidate genes enriched in SpudDB co-expression modules.**
